# Supplementary material for: Sustained Cytotoxic Response of Peripheral Blood Mononuclear Cells from Unvaccinated Individuals Admitted to the ICU Due to Critical COVID-19 Is Essential to Avoid a Fatal Outcome
Source: MDPI journal article supplement (doi:10.3390/ijerph20031947), 2023-01-20
Supplement: s1 [file s1]

**Supplemental Table S1.** Sociodemographic and clinical characteristics of the individuals with severe and critical COVID-19 recruited for this study at the ICU of Hospital Universitario Ramón y Cajal (Madrid, Spain) between October 2020 and April 2021.

| Patient's ID | Sample (weeks) | Demographical data |        |        | Signs and symptoms      |         |       |           |                        |          |          |          | Treatment                                        | Comorbidities |     |     |     |
|--------------|----------------|--------------------|--------|--------|-------------------------|---------|-------|-----------|------------------------|----------|----------|----------|--------------------------------------------------|---------------|-----|-----|-----|
|              |                | Age (years)        | Gender | Exitus | Cough and expectoration | Dyspnea | Fever | Pneumonia | Diarrhoea and vomiting | Lethargy | Migraine | Asthenia |                                                  | DM            | DL  | HT  | DIC |
| 1            | 0              | 65                 | F      | Yes    | Yes                     | Yes     | Yes   | Yes       | Yes                    | No       | No       | Yes      | LMWH, dexamethasone                              | No            | Yes | No  | No  |
|              | 2              |                    |        |        | Yes                     | Yes     | Yes   | Yes       | No                     | No       | No       | No       | Dexamethasone, LMWH, antibiotics                 |               |     |     |     |
| 2            | 0              | 65                 | M      | Yes    | Yes                     | Yes     | Yes   | Yes       | Yes                    | Yes      | Yes      | Yes      | Dexamethasone, tocilizumab, antibiotics          | No            | No  | No  | No  |
|              | 4              |                    |        |        | Yes                     | Yes     | Yes   | Yes       | Yes                    | Yes      | Yes      | Yes      | Dexamethasone, tocilizumab, antibiotics          |               |     |     |     |
|              | 6              |                    |        |        | Yes                     | No      | Yes   | Yes       | Yes                    | Yes      | No       | Yes      | Ceftazidime-Avibactam, Linezolid                 |               |     |     |     |
| 3            | 0              | 69                 | M      | Yes    | No                      | No      | Yes   | Yes       | No                     | No       | No       | No       | Dexamethasone, remdesivir, LMWH                  | No            | Yes | Yes | No  |
|              | 4              |                    |        |        | Yes                     | Yes     | Yes   | Yes       | No                     | No       | No       | Yes      | Und.                                             |               | No  |     |     |
|              | 6              |                    |        |        | Yes                     | Yes     | Yes   | Yes       | No                     | No       | No       | Yes      | Und.                                             |               | No  |     |     |
| 4            | 0              | 74                 | M      | Yes    | No                      | No      | Yes   | Yes       | No                     | No       | No       | No       | Dexamethasone, tocilizumab                       | No            | No  | No  | No  |
|              | 4              |                    |        |        | No                      | No      | Yes   | Yes       | No                     | No       | No       | No       | Dexamethasone, tocilizumab                       |               |     |     |     |
| 5            | 0              | 65                 | M      | Yes    | Yes                     | No      | Yes   | Yes       | Yes                    | Yes      | No       | Yes      | Ceftazidime-Avibactam, Linezolid, Isavuconazol   | No            | No  | No  | No  |
|              | 2              |                    |        |        | Yes                     | No      | Yes   | Yes       | Yes                    | Yes      | No       | Yes      | Meropenem, Linezolid, Isavuconazol               |               |     |     |     |
| 6            | 0              | 56                 | M      | Yes    | No                      | Yes     | Yes   | Yes       | No                     | No       | No       | No       | Dexamethasone, LMWH                              | Yes           | Yes | Yes | No  |
|              | 4              |                    |        |        | Yes                     | Yes     | No    | Yes       | No                     | No       | No       | No       | Und.                                             |               | No  | No  |     |
| 7            | 0              | 78                 | M      | Yes    | No                      | Yes     | Yes   | Yes       | No                     | No       | No       | No       | Ceftriaxone, Levofloxacin, Corticosteroids, LMWH | Yes           | No  | Yes | No  |
|              | 2              |                    |        |        | No                      | Yes     | Yes   | Yes       | No                     | No       | No       | No       | Und.                                             |               |     |     |     |
| 8            | 0              | 64                 | F      | Yes    | Yes                     | Yes     | Yes   | Yes       | No                     | No       | No       | Yes      | Piperacillin-Tazobactam, Dexamethasone, LMWH     | No            | No  | No  | No  |
|              | 2              |                    |        |        | Yes                     | Yes     | Yes   | Yes       | No                     | No       | No       | Yes      | Meropenem, Linezolid, Dexamethasone, LMWH        |               |     |     |     |
| 9            | 0              | 63                 | M      | Yes    | Yes                     | Yes     | No    | Yes       | No                     | No       | No       | No       | Piperacillin-Tazobactam, Dexamethasone, LMWH     | No            | Yes | Yes | No  |
|              | 2              |                    |        |        | Yes                     | Yes     | No    | Yes       | No                     | No       | No       | No       | Und.                                             |               |     |     |     |
| 10           | 0              | 56                 | M      | Yes    | No                      | No      | Yes   | Yes       | Yes                    | No       | No       | No       | Dexamethasone, methylprednisolone                | No            | Yes | Yes | No  |
|              | 4              |                    |        |        | Yes                     | Yes     | Yes   | Yes       | Yes                    | Yes      | Yes      | Yes      | LMWH                                             |               |     |     |     |
|              | 8              |                    |        |        | Yes                     | Yes     | Yes   | Yes       | Yes                    | Yes      | Yes      | Yes      | Und.                                             |               |     |     |     |
|              | 10             |                    |        |        | Yes                     | Yes     | Yes   | Yes       | Yes                    | Yes      | Yes      | Yes      | Und.                                             |               |     |     |     |
|              | 11             |                    |        |        | Yes                     | Yes     | Yes   | Yes       | Yes                    | Yes      | Yes      | Yes      | Und.                                             |               |     |     |     |
|              | 12             |                    |        |        | Yes                     | Yes     | Yes   | Yes       | Yes                    | Yes      | Yes      | Yes      | Und.                                             |               |     |     |     |

|    |    |    |   |     |      |      |      |      |      |      |      |      |                                                                               |     |     |     |    |
|----|----|----|---|-----|------|------|------|------|------|------|------|------|-------------------------------------------------------------------------------|-----|-----|-----|----|
| 11 | 0  | 62 | M | Yes | Yes  | Yes  | Yes  | Yes  | Yes  | No   | No   | Yes  | Piperacillin-Tazobactam,<br>vancomycin                                        | Yes | Yes | Yes | No |
|    | 2  |    |   |     | Yes  | Yes  | Yes  | Yes  | Yes  | No   | No   | Yes  | Daptomycin, Fluconazole                                                       |     |     |     |    |
|    | 4  |    |   |     | Yes  | Yes  | Yes  | Yes  | Yes  | No   | No   | Yes  | Ceftazidime-Avibactam                                                         |     |     |     |    |
|    | 5  |    |   |     | Yes  | Yes  | Yes  | Yes  | Yes  | No   | No   | Yes  | Anidulafungin, Ceftazidime-Avibactam, Ganciclovir                             |     |     |     |    |
|    | 6  |    |   |     | Yes  | Yes  | Yes  | Yes  | Yes  | No   | No   | Yes  | Anidulafungin, Ceftazidime-Avibactam, Ganciclovir, Linezolid                  |     |     |     |    |
|    | 8  |    |   |     | Yes  | Yes  | Yes  | Yes  | Yes  | No   | No   | Yes  | Ceftazidime-Avibactam, Amikacina, Vancomycin, Levofloxacin, Voriconazol, LMWH |     |     |     |    |
|    | 9  |    |   |     | Yes  | Yes  | Yes  | Yes  | Yes  | No   | No   | Yes  | Und.                                                                          |     |     |     |    |
| 12 | 0  | 77 | M | Yes | Yes  | Yes  | Yes  | Yes  | Yes  | Yes  | Yes  | Yes  | Ceftolozano/tazobactam, tocilizumab, corticosteroids, LMWH                    | No  | Yes | No  | No |
|    | 4  |    |   |     | No   | No   | Yes  | Yes  | No   | Yes  | Yes  | Yes  | Tocilizumab, dexamethasone, Ceftolozano/tazobactam                            |     |     |     |    |
| 13 | 0  | 53 | M | Yes | Yes  | Yes  | Yes  | Yes  | Yes  | No   | Yes  | No   | Cefepime, Levofloxacin, Isavuconazol, LMWH                                    | Yes | No  | No  | No |
|    | 2  |    |   |     | Yes  | Yes  | Yes  | Yes  | Yes  | No   | Yes  | No   | LMWH                                                                          |     |     |     |    |
| 14 | 0  | 58 | M | No  | Yes  | Yes  | Yes  | Yes  | No   | Yes  | No   | Yes  | LMWH, corticosteroids                                                         | No  | Yes | No  | No |
|    | 4  |    |   |     | No   | Yes  | Yes  | Yes  | No   | Yes  | No   | Yes  | LMWH, daptomycin, colistin, azithromycin                                      |     |     |     |    |
|    | 12 |    |   |     | No   | Yes  | Yes  | Yes  | No   | Yes  | No   | Yes  | Und.                                                                          |     |     |     |    |
|    | 13 |    |   |     | No   | Yes  | Yes  | Yes  | No   | Yes  | No   | Yes  | Und.                                                                          |     |     |     |    |
| 15 | 0  | 76 | M | No  | Yes  | Yes  | Yes  | Yes  | No   | No   | No   | Yes  | Piperacillin-tazobactam, LMWH , corticosteroids                               | No  | No  | No  | No |
|    | 4  |    |   |     | Yes  | Yes  | Yes  | Yes  | No   | No   | No   | Yes  | Piperacillin-tazobactam, LMWH , corticosteroids                               |     |     |     |    |
|    | 8  |    |   |     | No   | Yes  | Yes  | Yes  | No   | No   | No   | Yes  | Pentylenetetrazol                                                             |     |     |     |    |
| 16 | 0  | 56 | F | No  | Yes  | Yes  | Yes  | Yes  | No   | Yes  | Yes  | Yes  | Dexamethasone, LMWH, antibiotics, remdesivir                                  | No  | No  | No  | No |
|    | 4  |    |   |     | Yes  | Yes  | Yes  | Yes  | No   | Yes  | Yes  | Yes  | Dexamethasone, LMWH, antibiotics, remdesivir                                  |     |     |     |    |
|    | 6  |    |   |     | No   | No   | No   | Yes  | Yes  | No   | No   | Yes  | LMWH                                                                          |     |     |     |    |
| 17 | 0  | 70 | M | No  | No   | No   | Yes  | Yes  | No   | No   | No   | Yes  | Dexamethasone, tocilizumab                                                    | No  | Yes | Yes | No |
|    | 4  |    |   |     | No   | No   | Yes  | Yes  | No   | No   | No   | Yes  | Dexamethasone, tocilizumab                                                    |     |     |     |    |
|    | 6  |    |   |     | Yes  | Yes  | Yes  | Yes  | Yes  | No   | No   | Yes  | LMWH                                                                          |     |     |     |    |
| 18 | 0  | 62 | F | No  | Yes  | Yes  | Yes  | Yes  | No   | Yes  | Yes  | Yes  | Dexamethasone, antibiotics                                                    | Yes | Yes | Yes | No |
|    | 4  |    |   |     | No   | No   | Yes  | Yes  | No   | No   | No   | No   | Und.                                                                          |     |     | No  | No |
|    | 8  |    |   |     | No   | No   | Yes  | Yes  | No   | No   | No   | No   | Und.                                                                          |     |     | No  | No |
| 19 | 0  | 71 | F | No  | Und. | Ceftriaxone, LMWH, dexamethasone                                              | Yes | Yes | Yes | No |

|    |   |    |   |    |      |      |      |      |      |      |      |                               |                                         |    |     |     |    |
|----|---|----|---|----|------|------|------|------|------|------|------|-------------------------------|-----------------------------------------|----|-----|-----|----|
|    | 2 |    |   |    | Und. | LMWH, Piperacillin-tazobactam |                                         |    |     |     |    |
|    | 3 |    |   |    | Und. | LMWH                          |                                         |    |     |     |    |
| 20 | 0 | 50 | M | No | Yes  | Yes  | Yes  | Yes  | No   | No   | No   | Yes                           | Pentylene-tetrazol, dexamethasone, LMWH | No | No  | No  | No |
|    | 2 |    |   |    | Yes  | Yes  | Yes  | Yes  | No   | No   | No   | Yes                           | Und.                                    |    |     |     |    |
|    | 3 |    |   |    | Yes  | Yes  | Yes  | Yes  | No   | No   | No   | Yes                           | Meropenem                               |    |     |     |    |
| 21 | 0 | 62 | M | No | Yes  | Yes  | No   | Yes  | No   | No   | No   | No                            | LMWH                                    | No | Yes | Yes | No |
|    | 2 |    |   |    | Yes  | Yes  | No   | Yes  | No   | No   | No   | No                            | Ceftazidime Avibactam                   |    |     |     |    |
|    | 6 |    |   |    | Yes  | Yes  | No   | Yes  | No   | No   | No   | No                            | Und.                                    |    |     |     |    |
| 22 | 0 | 64 | M | No | Yes  | Yes  | Yes  | Yes  | No   | No   | No   | Yes                           | Dexamethasone, antibiotics, LMWH        | No | No  | No  | No |
|    | 6 |    |   |    | Yes  | Yes  | Yes  | Yes  | No   | Yes  | No   | No                            | Und.                                    |    |     |     |    |
| 23 | 0 | 64 | F | No | Yes                           | Dexamethasone, LMWH, antibiotics        | No | Yes | Yes | No |
|    | 4 |    |   |    | Yes                           | Dexamethasone, LMWH antibiotics         |    |     |     |    |

DIC: disseminated intravascular coagulation; DL: dyslipidaemia; DM: diabetes mellitus; F: female; HT: hypertension; LMWH: low molecular weight heparin; M: male; Undetermined: Und.
