# Supplementary material for: Sustained Cytotoxic Response of Peripheral Blood Mononuclear Cells from Unvaccinated Individuals Admitted to the ICU Due to Critical COVID-19 Is Essential to Avoid a Fatal Outcome
Source: MDPI journal article supplement (doi:10.3390/ijerph20031947), 2023-01-20
Supplement: s1 [file s1]

**Supplemental Table S2.** Data of hospitalization and blood biochemistry of the individuals with severe and critical COVID-19 recruited for this study at the ICU of Hospital Universitario Ramón y Cajal (Madrid, Spain) between October 2020 and April 2021.

| Patient's ID | Sample (weeks) | Hospitalization             |                 |     |     |           |               | Blood biochemistry data |           |          |                  |              |                 |                       |                        |                      |                      |                    |
|--------------|----------------|-----------------------------|-----------------|-----|-----|-----------|---------------|-------------------------|-----------|----------|------------------|--------------|-----------------|-----------------------|------------------------|----------------------|----------------------|--------------------|
|              |                | Hospitalization time (days) | Days at the ICU | NIV | IV  | Reservoir | Nasal Glasses | CRP (mg/L)              | LDH (U/L) | CK (U/L) | Ferritin (ng/mL) | IL-6 (pg/mL) | D-dimer (ug/mL) | Procalcitonin (ng/mL) | Lymphocytes (cells/mL) | Monocytes (cells/mL) | Platelets (cells/mL) | Fibrinogen (mg/dL) |
| 1            | 0              | 42                          | 38              | No  | Yes | No        | No            | 173.6                   | 328       | -        | 889.97           | 27.8         | -               | 0.4                   | 1370                   | 1260                 | 142000               | 552.5              |
|              | 2              |                             |                 | No  | Yes | No        | No            | 135.3                   | 242       | -        | 887.97           | -            | -               | -                     | 1240                   | 1390                 | 140000               | 491.6              |
| 2            | 0              | 100                         | 87              | No  | Yes | No        | No            | 24.7                    | 635       | -        | -                | 635.8        | 4045            | -                     | 870                    | 230                  | 277000               | 740                |
|              | 4              |                             |                 | No  | Yes | No        | No            | 34.8                    | 272       | -        | 299.46           | -            | -               | -                     | 1320                   | 420                  | 445000               | 740                |
|              | 6              |                             |                 | No  | Yes | No        | No            | 186                     | 250       | -        | -                | -            | 805             | 0.12                  | 1910                   | 920                  | 776000               | 740                |
| 3            | 0              | 51                          | 49              | No  | Yes | No        | No            | 143.4                   | 527       | 325      | -                | 72.6         | -               | 0.06                  | 620                    | 490                  | 181000               | -                  |
|              | 4              |                             |                 | No  | Yes | No        | No            | 3.1                     | 313       | -        | 1076             | -            | -               | -                     | 1100                   | 1130                 | 214000               | 256                |
| 4            | 0              | 59                          | 59              | No  | Yes | No        | No            | 18.4                    | 238       | 40       | 521.24           | -            | -               | -                     | 790                    | 810                  | 221000               | -                  |
|              | 4              |                             |                 | No  | Yes | No        | No            | 100.8                   | 411       | -        | -                | -            | -               | -                     | 1720                   | 830                  | 293000               | 740                |
| 5            | 0              | 100                         | 100             | No  | Yes | No        | No            | 104                     | 295       | -        | -                | -            | -               | 0.04                  | 1330                   | 530                  | 765000               | 665                |
|              | 2              |                             |                 | No  | Yes | No        | No            | 304                     | 345       | -        | -                | -            | 3307            | 0.14                  | 2160                   | 740                  | 748000               | 536                |
| 6            | 0              | 62                          | 16              | No  | No  | Yes       | No            | 55.9                    | 345       | -        | 2496.95          | 33.8         | 3636            | 2.11                  | 900                    | 2240                 | 261000               | 484.4              |
|              | 4              |                             |                 | No  | No  | No        | No            | 2.8                     | 170       | -        | -                | -            | -               | -                     | 1290                   | 2550                 | 159000               | -                  |
| 7            | 0              | 22                          | 22              | No  | Yes | No        | No            | 205                     | -         | -        | -                | -            | 2168            | 0.61                  | 340                    | 130                  | 168000               | 740                |
|              | 2              |                             |                 | No  | Yes | No        | No            | 24                      | 212       | -        | -                | -            | -               | -                     | 850                    | 360                  | 194000               | -                  |
| 8            | 0              | 30                          | 29              | No  | Yes | No        | No            | 202                     | 1094      | -        | -                | -            | 35000           | -                     | 860                    | 290                  | 468000               | 740                |
|              | 2              |                             |                 | No  | Yes | No        | No            | 268                     | 739       | -        | -                | -            | 1858            | -                     | 520                    | 310                  | 452000               | 740                |
| 9            | 0              | 16                          | 13              | No  | Yes | No        | No            | 108                     | 13        | -        | -                | -            | 1024            | 0.02                  | 370                    | 360                  | 313000               | 740                |
|              | 2              |                             |                 | No  | Yes | No        | No            | 151                     | 85        | -        | -                | -            | 5172            | 1.38                  | 1410                   | 1390                 | 195000               | 740                |
| 10           | 0              | 141                         | 96              | No  | Yes | No        | No            | 30.2                    | 340       | -        | 2530.05          | 24.8         | -               | -                     | 1140                   | 490                  | 142000               | 740                |
|              | 4              |                             |                 | No  | Yes | No        | No            | 20                      | 311       | -        | -                | -            | -               | -                     | 1320                   | 560                  | 269000               | -                  |
|              | 8              |                             |                 | No  | No  | No        | Yes           | 38                      | 548       | -        | -                | -            | -               | 0.06                  | 1730                   | 950                  | 303000               | 740                |
|              | 10             |                             |                 | No  | No  | No        | Yes           | 18                      | 382       | -        | -                | -            | -               | 44317                 | 1840                   | 980                  | 303000               | 683                |
|              | 11             |                             |                 | No  | No  | No        | Yes           | 172                     | 358       | -        | -                | -            | -               | -                     | 1040                   | 620                  | 322000               | 742                |
|              | 12             |                             |                 | No  | No  | No        | Yes           | 17                      | 375       | -        | -                | -            | -               | 0.14                  | 2010                   | 800                  | 593000               | 497                |
| 11           | 0              | 101                         | 77              | No  | Yes | No        | No            | 210                     | 562       | -        | -                | -            | -               | 0.97                  | 820                    | 330                  | 27000                | 740                |
|              | 2              |                             |                 | No  | Yes | No        | No            | 2.9                     | 595       | -        | -                | -            | 7407            | 0.03                  | 1490                   | 680                  | 221000               | 217                |
|              | 4              |                             |                 | No  | Yes | No        | No            | 24                      | 415       | -        | -                | -            | 1920            | 0.03                  | 1120                   | 710                  | 205000               | 275                |
|              | 5              |                             |                 | Yes | No  | No        | No            | 248                     | 496       | -        | -                | -            | -               | 0.35                  | 1230                   | 230                  | 210000               | 740                |
|              | 6              |                             |                 | Yes | No  | No        | No            | 50                      | 641       | -        | -                | -            | -               | 0.11                  | 680                    | 140                  | 106000               | 184                |
|              | 8              |                             |                 | No  | Yes | No        | No            | 89                      | 496       | -        | -                | -            | -               | 0.03                  | 1020                   | 370                  | 290000               | 190                |
|              | 9              |                             |                 | No  | Yes | No        | No            | 21                      | -         | -        | -                | -            | -               | -                     | 1080                   | 440                  | 390000               | 381                |
| 12           | 0              | 43                          | 39              | No  | Yes | No        | No            | 10.1                    | 502       | -        | 1254.29          | 386.2        | 9200            | 0.2                   | 440                    | 220                  | 191000               | 299.3              |
|              | 4              |                             |                 | No  | Yes | No        | No            | 65.2                    | 386       | -        | 326.45           | -            | 3628            | 0.4                   | 1500                   | 560                  | 133000               | 558.1              |
| 13           | 0              | 82                          | 74              | No  | Yes | No        | No            | 267                     | 522       | 15       | -                | -            | 17099           | -                     | 1090                   | 700                  | 96000                | 740                |

|           |    |     |     |    |     |     |     |       |      |    |         |        |       |      |      |      |        |        |     |
|-----------|----|-----|-----|----|-----|-----|-----|-------|------|----|---------|--------|-------|------|------|------|--------|--------|-----|
|           | 2  |     |     | No | Yes | No  | No  | 196   | 279  | -  | -       | -      | -     | -    | 820  | 730  | 235000 | 508    |     |
| <b>14</b> | 0  | 112 | 75  | No | Yes | No  | No  | 49.4  | 353  | -  | 163     | 130    | 3929  | 0.08 | 1350 | 780  | 836000 | 601    |     |
|           | 4  |     |     | No | Yes | No  | No  | 279   | -    | -  | -       | -      | -     | -    | 1770 | 870  | 366000 | 740    |     |
|           | 12 |     |     | No | Yes | No  | No  | 67    | 197  | -  | -       | -      | -     | -    | -    | 1610 | 660    | 659000 | 571 |
|           | 13 |     |     | No | No  | Yes | No  | 21.5  | 215  | -  | -       | -      | -     | -    | -    | 1860 | 750    | 763000 | 740 |
| <b>15</b> | 0  | 101 | 79  | No | Yes | No  | No  | 4.2   | 470  | 42 | 1333.2  | 1076.2 | 7091  | 0.17 | 2440 | 620  | 274000 | 375.1  |     |
|           | 4  |     |     | No | Yes | No  | No  | 241.6 | 56.5 | -  | 1024.41 | -      | 1676  | -    | 1910 | 780  | 632000 | 695.7  |     |
|           | 8  |     |     | No | No  | No  | Yes | -     | -    | -  | -       | -      | -     | -    | -    | 1510 | 1030   | 335000 | -   |
| <b>16</b> | 0  | 60  | 39  | No | Yes | No  | No  | 164.5 | -    | -  | 3108.58 | 1.09   | -     | 0.07 | 740  | 720  | 426000 | 740    |     |
|           | 4  |     |     | No | Yes | No  | No  | 24.3  | 422  | -  | 766.07  | -      | -     | -    | -    | 840  | 390    | 242000 | -   |
|           | 6  |     |     | No | No  | No  | No  | 4.2   | 256  | -  | -       | -      | -     | -    | -    | 1700 | 550    | 393000 | 370 |
| <b>17</b> | 0  | 73  | 58  | No | Yes | No  | No  | 96.8  | 388  | 27 | 1361.8  | 1258.7 | -     | -    | 630  | 170  | 72000  | 601.7  |     |
|           | 4  |     |     | No | Yes | No  | No  | 124.9 | 380  | -  | 1361.68 | -      | -     | -    | 0.11 | 2010 | 580    | 304000 | 740 |
|           | 6  |     |     | No | No  | No  | Yes | 8.5   | 237  | -  | -       | -      | -     | -    | -    | 3100 | 400    | 198000 | 197 |
| <b>18</b> | 0  | 79  | 58  | No | Yes | No  | No  | 84    | 372  | -  | -       | 61.4   | -     | -    | 1880 | 460  | 173000 | 564.6  |     |
|           | 4  |     |     | No | Yes | No  | No  | 22.3  | 265  | -  | -       | -      | -     | 0.07 | 2650 | 630  | 179000 | 387    |     |
|           | 8  |     |     | No | No  | No  | No  | 2.2   | 197  | -  | -       | -      | -     | -    | 4210 | 600  | 236000 | 443    |     |
| <b>19</b> | 0  | Und | Und | No | Yes | No  | No  | 150   | 423  | -  | -       | -      | 17100 | 0.12 | 1040 | 740  | 294000 | 740    |     |
|           | 2  |     |     | No | No  | No  | Yes | 11    | 248  | -  | -       | -      | -     | 2038 | 0.03 | 1440 | 790    | 307000 | 670 |
|           | 3  |     |     | No | No  | No  | Yes | 13    | -    | -  | -       | -      | -     | -    | -    | 1280 | 720    | 374000 | -   |
| <b>20</b> | 0  | 23  | 14  | No | No  | Yes | No  | 205   | 615  | 91 | 5280    | 3.18   | -     | 0.33 | 900  | 470  | 459000 | 740    |     |
|           | 2  |     |     | No | Yes | No  | No  | 58    | 210  | 13 | 1053    | 52     | 1460  | -    | -    | 1730 | 680    | 332000 | 740 |
|           | 3  |     |     | No | No  | No  | Yes | 30    | 285  | -  | -       | -      | -     | -    | -    | 1130 | 970    | 435000 | -   |
| <b>21</b> | 0  | 29  | 16  | No | Yes | No  | No  | 16    | 365  | -  | -       | -      | -     | -    | 1500 | 1810 | 123000 | -      |     |
|           | 2  |     |     | No | No  | No  | No  | 13    | 393  | -  | -       | -      | -     | -    | -    | 1610 | 900    | 112000 | 231 |
|           | 6  |     |     | No | No  | No  | No  | 19    | 261  | -  | -       | -      | -     | -    | -    | 2370 | 1130   | 154000 | 307 |
| <b>22</b> | 0  | 74  | 34  | No | Yes | No  | No  | 175.3 | 664  | -  | 3794.97 | 20.8   | 21973 | -    | 990  | 1010 | 506000 | 740    |     |
|           | 6  |     |     | No | No  | No  | Yes | 17.9  | 613  | 88 | -       | 7      | -     | -    | -    | 1830 | 700    | 457000 | -   |
| <b>23</b> | 0  | 62  | 44  | No | Yes | No  | No  | 214   | 255  | -  | 1469    | 24.4   | -     | -    | 930  | 300  | 211000 | 740    |     |
|           | 4  |     |     | No | Yes | No  | No  | 127.2 | 407  | 44 | 629.14  | -      | -     | -    | 0.67 | 2590 | 700    | 440000 | -   |

CK: creatine kinase; CRP: C reactive protein; ICU: intensive care unit; IL-6: interleukin-6; IV: invasive ventilation; LDH: lactate dehydrogenase; NIV: non-invasive ventilation; Und: Undetermined.
